# Supplementary material for: Uncovering the Mechanism of Astragalus membranaceus in the Treatment of Diabetic Nephropathy Based on Network Pharmacology
Source: J Diabetes Res. 2020 Mar 2;2020:5947304. doi: 10.1155/2020/5947304 (PMC7079250; doi:10.1155/2020/5947304)
Supplement: Supplementary 2 — Table S2: Screening of common targets for DN and AM. [file 5947304.f2.xlsx]

## Sheet: Sheet1
AM	DisGeNET	GeneCards	Commom
PGR	FN1	INS	MMP2
NOS2	CNDP1	ACE	NOS2
PTGS1	ACE	GCK	PRKCB
AR	NOS3	HNF1B	BCL2
SCN5A	ACE2	HNF1A	NFE2L2
PTGS2	SERPINE1	KCNJ11	TNF
ESR2	ADIPOQ	HNF4A	IL1A
DPP4	ELMO1	ABCC8	SPP1
HSP90AA1	PPARG	IL6	PTGS2
CDK2	TGFB1	PDX1	ESR1
CHEK1	AGT	ALB	VEGFA
PRSS1	CCL2	AGTR1	TGFB1
CHRM3	VEGFA	VEGFA	MMP3
CHRM1	ALB	WFS1	IL10
GABRA2	INS	CCL2	MAPK1
GABRA3	NFE2L2	REN	EGFR
CHRM2	TXNIP	LEP	SOD1
ADRA1B	CNDP2	AGT	MAPK8
GABRA1	SOD2	APOA1	AKR1B1
GRIA2	TGFBI	IGF1	CDKN1A
GABRA5	PON1	NOS3	LYZ
LYZ	KDR	UMOD	SIRT1
RXRA	KLK1	B2M	IL1B
PDE3A	TGFBR2	PON1	HTR2A
SLC6A2	MDK	ADIPOQ	GJA1
ESR1	GAS6	INSR	DPP4
MAPK14	RELA	PPARG	PON1
GSK3B	COL4A1	HFE	E2F1
PRKACA	PRKCE	HLA-DQA1	PPARG
PIM1	AXL	AVP	CXCL8
CCNA2	TINAG	AKR1B1	THBD
PYGM	TNFAIP1	HLA-DRB1	MAPK14
PPARG	DGKH	APOE	MPO
F7	CDKN1A	AQP2	CCL2
NOS3	VDAC1	TNF	IL6
ACHE	MIR145	EPO	KDR
MAOB	VDAC2	SOD2	PPARA
XDH	ALPK1	AGER	IGF2
NCF1	AOC3	CTLA4	HSPA5
ADRB1	MYH9	TGFB1	CAV1
HTR3A	APOL1	ENPP1	HIF1A
ADRA2C	JAK1	CRP	NOS3
ADRB2	SLC2A1	SLC2A2	SERPINE1
ADRA1D	CTGF	CAT	INSR
OPRM1	TNF	CCR5	PTGS1
DRD1	AGTR1	IL1RN	JUN
KCNH2	APOE	BSCL2	PRKCA
F10	AGER	SERPINE1	PRSS1
CHRM4	MTHFR	AGPAT2
OPRD1	TBC1D31	AKT1
HTR2A	SASH1	IGF2
ADRA1A	AKR1B1	TCF7L2
SLC6A3	REN	NPHS1
SLC6A4	RAPGEF5	PIK3R1
CHRNA7	IL6	NEUROD1
KDR	MMP9	AIRE
MET	CCR5	IRS1
blaZ	GREM1	PCBD1
JUN	CCR2	EIF2AK3
IL4	VDR	AVPR2
SIRT1	HPSE	ZFP57
IKBKB	ENPP1	EDN1
BCL2	SLC12A3	COL4A1
TNF	GABPA	CD79A
MAPK8	SGK1	HLA-DQB1
MMP1	MBL2	STAT3
CDK1	CYBA	NPHP1
HMOX1	PRKCB	NAGLU
CYP3A4	PIK3CG	WT1
ICAM-1	DECR1	APOA2
SELE	PIK3CB	MUC1
VCAM1	PIK3CA	BMP6
CYP1B1	PIK3CD	TTR
ALOX5	MIR21	RETN
GSTP1	ACTN4	VCAM1
AHR	IHG1	GCG
INSR	ICAM1	IL1B
DIO1	XYLT2	CASR
AKR1C3	DIANPH	XPNPEP3
AKR1B1	MOK	RBP4
MMP3	MMRN1	NLRP3
EGFR	SOD1	ICAM1
VEGFA	FOXC1	LMNA
CCND1	VPS51	G6PC
FOS	CAT	PLAGL1
CDKN1A	THBS1	CAPN10
CASP9	ADM	KCNQ1
PLAU	NOX4	CST3
MMP2	ANGPT2	MIR21
MMP-9	NPHS1	SST
MAPK1	THG1L	SELE
IL10	DCN	SLC30A8
IL6	MPO	FN1
TP53	TNFRSF11B	FOXC2
ODC1	PNPLA2	LPA
CASP8	CCL5	VWF
SOD1	FGF2	COL4A5
PRKCA	HNF4A	SLC2A4
HIF1A	SERPINF1	INS-IGF2
HSPA5	BMP7	SGK1
ERBB2	HFE	ALMS1
ACC1	NLRP3	MEG3
CAV1	IGAN1	IAPP
MYC	NOX5	SLC2A1
F3	NFKB1	APOB
GJA1	SUMO4	MIR192
IL1B	GH1	SLC19A2
CCL2	MIR192	GAD2
PTGER3	CD74	PVT1
CXCL8	CDC42	IFNG
PRKCB	XYLT1	IGF2BP2
BIRC5	IL18	C3
TGFB1	KNG1	HRAS
MGAM	MMP2	HMGCR
IL2	TLR4	LCN2
CCNB1	KCNQ1	PTPN22
PLAT	TRPC1	NPPA
THBD	ATP6AP2	VDR
SERPINE1	SMAD1	TP53
IFNG	SLC5A4	MTHFR
IL1A	IL1RN	SERPINB7
MPO	SLC5A2	IL2RA
NFE2L2	SMAD7	NPHS2
PARP1	CD44	MMP9
CHEK2	SPP1	DPP4
CLDN4	EGF	CISD2
PPARA	JAK2	SELP
CHUK	NPPA	IRS2
SPP1	MMP3	WRN
RUNX2	MIR30C2	GHRL
E2F1	MIR30C1	AMBP
E2F2	LRP6	COL4A3
ACPP	MIR126	MT-ND1
CTSD	NPY	FGF2
TMEM219	MIF	APOC3
IGF2	FRMD3	CD40LG
CD40LG	LCN2	CNDP1
IRF1	NR3C2	LEPR
ERBB3	LIPC	ATF6
PON1	LPL	HP
NPEPPS	TRNT	CDKN2A
NKX3-1	NPPB	AOC3
	NSA2	ADRB3
	SLC2A2	AKT2
	BASP1	CXCL8
	SLC22A3	TNFRSF11B
	STAT5A	MIR377
	STAT5B	LEPQTL1
	TALDO1	PRKCB
	TCF7L2	GATA3
	TIMP2	LIPC
	KL	COL4A4
	TIMP3	GPT
	TKT	PAX6
	SPHK1	MME
	TNFSF10	SERPINF1
	NPHS2	MC4R
	UCP2	BGLAP
	SDC2	SUMO4
	CCL20	MT-TL1
	NOX1	FOXP3
	NOD2	LPL
	PITX2	SOD1
	ERRFI1	FGA
	PPARA	SLC12A1
	GHRL	CAV1
	NR1H4	CCN2
	MAPK3	PRKCD
	PTH	UCP3
	PTGS2	APPL1
	PVT1	LTA
	PGR-AS1	IL10
	FGF21	MBL2
	RBP4	CDKAL1
	SIRT1	LCAT
	RENBP	NPPB
	VWF	FASLG
	HSPG2	F2
	CTNNB1	GHR
	ACVRL1	HSPD1
	FABP1	GNAS
	IL1B	FLT1
	CDKN2A	IGF1R
	CCR1	HGF
	IGF1	IGFBP1
	BMP2	TMEM67
	AGTR2	NAMPT
	ID2	IL2
	GJA1	ANGPT2
	CETP	GLA
	GLP1R	PTH
	DPP4	IL18
	ENTPD1	UTS2
	APOC3	MPO
	FGF13	MAFB
	CALD1	CP
	INSR	TPO
	CAV1	NOD2
	EDN1	HLA-B
	BCR	PPARA
	KLF6	IFIH1
	EGFR	MTNR1B
	HIF1A	SLC12A3
	ACACB	HLA-DPB1
	IGF2	ADRB2
	IL10	HSD11B2
	GFPT1	MYH9
	SORBS1	SLC5A2
	KHDRBS1	CFTR
	ADAMTS13	IFT172
	HYOU1	TF
	ESM1	HBA1
	RAB38	CD2AP
	IGF2BP2	IGFBP3
	GRAP	FTO
	NFAT5	CETP
	UTS2	IL1A
	CARS	PKD1
	MMP24	SHBG
	PPARGC1A	PPARGC1A
	BGN	MIR181A2
	DDAH2	CEP290
	DDAH1	UCP2
	DAPK2	GGT1
	CD2AP	PTPN1
	NUP62	NPHP3
	TNFAIP8	KDR
	IPCEF1	PKD2
	BCL2	H19
	SRRM2	THBD
	MLYCD	SPP1
	CRTC1	LRP2
	PACSIN2	SPINK1
	SCAF8	AGTR2
	VASH1	MALAT1
	BMP4	NOS2
	ATF6	CCL5
	DKK1	RPGR
	CIC	TG
	SCAF4	TLR4
	ATP5F1B	HMOX1
	UNC13B	BDNF
	CUL5	PLAT
	COL1A2	PPP1R15B
	SQSTM1	SCGB1A1
	SELENBP1	RPGRIP1L
	SLC33A1	UBD
	SLC22A6	PTGS2
	PPIG	PGF
	CUBN	IL4
	CNR1	APOA5
	TSC22D1	UCP1
	IQGAP1	BRAF
	IL18R1	NR2E3
	HMGA2	IFT140
	AXIN2	CASP3
	LOH19CR1	SORD
	NR0B2	PCSK2
	DENR	CCND1
	COL8A2	MTTP
	IRS2	SIRT1
	COL8A1	TGFB2
	SLC22A8	HLA-A
	PICK1	XDH
	GDF15	PTPN3
	CALCRL	VIPAS39
	RAMP2	APRT
	AKR1A1	TH
	NUAK1	GCKR
	TRDN	ST3GAL4
	KLF2	MMP1
	SEMA3A	KRAS
	CD36	SDCCAG8
	CD59	MTOR
	EBI3	AHI1
	NR1H3	FABP1
	RIMS2	GJB2
	HDAC4	CC2D2A
	SFI1	EGF
	RB1CC1	ACTN4
	ZEB2	IFT88
	GFPT2	NR3C1
	CDH2	INVS
	DNM1L	GH1
	TIMM44	KCNQ1OT1
	HMCN1	LMX1B
	GLIPR2	NPY
	CNKSR3	ADIPOR1
	SLC2A12	WDR19
	JAG1	SCARB2
	PRSS55	FGF21
	FNDC5	SMAD2
	ADH1B	VTN
	SLC9C1	FABP2
	HCN1	MT-CO3
	RMDN2	MAPK8
	PLEKHH2	ADM
	CYP2R1	COG2
	NCALD	GIP
	DOT1L	MKS1
	SPZ1	SMAD3
	AKT1	FABP4
	MTG1	MT-CO1
	APLNR	IGFBP2
	DBA2	PECAM1
	MARCH3	PCSK1
	APOA5	PRKAA2
	ADD2	MIR29A
	MIRLET7B	MT-CO2
	MIR29B2	PIK3CG
	ABCA1	MT-ND4
	MIR93	HHEX
	MIR377	MAPK14
	NCF1	CD28
	NAT2	AHSG
	ZGLP1	VPS33B
	MIR1207	NPHP4
	CASP12	TREX1
	MIR29B1	CTNNB1
	MIR27A	PKHD1
	MIR25	BLM
	MIRLET7C	MT-ND6
	ADD1	HAVCR1
	MIR130B	CFH
	ADAM10	ACP1
	MIR146A	STAT1
	MIR199B	MIR217
	ACTG2	ACACB
	MIR210	TNFRSF1B
	MIR23B	HPRT1
	TFG	SERPINC1
	HAVCR1	FGF23
	MLXIPL	APLN
	RMDN1	ELMO1
	DCTN4	MIR29C
	PLEKHO1	MT-ND5
	ISYNA1	CDK4
	AQP5	TLR2
	AQP2	LDHA
	CCHCR1	PAPPA
	CDKAL1	SPRY2
	FOXP3	PDGFA
	MBL3P	GAS5
	IL20	MAPK1
	ATM	ACADS
	ANKRD1	GNB3
	IL17B	TTC21B
	ARRB2	COL4A2
	RBMS3	FOXO1
	HPGDS	ITLN1
	REM1	CTNS
	ARRB1	GYS1
	NOX3	PTGDS
	AQP1	TNFSF11
	RMDN3	HMGB1
	APOB	MEG8
	ANGPT1	CYP1A1
	ANG	ROBO2
	GORASP1	NR3C2
	SMURF2	RARRES2
	WNK1	IGF2R
	ALOX12	ANGPTL8
	LIN28A	CYP1A2
	EHMT1	GSTM1
	FN3K	TXNIP
	TSPYL2	PSTPIP1
	APOC1	CYP24A1
	KIRREL1	PRL
	SYBU	MMP2
	CRMP1	OAS1
	PNO1	WAS
	FASLG	BMP7
	LRRC7	GFPT1
	SEMA6A	XBP1
	MKL1	SOCS1
	ZNF410	CNR1
	ALDH2	SNRPN
	NOTCH3	ADIPOR2
	HCCS	LOC108783645
	HBA1	MIR25
	GTF2H1	SOCS3
	GSTM1	SLC5A1
	PIK3R1	MFN2
	PIK3R2	CASP8
	GSK3B	CYP11B2
	PKD1	CDKN2B
	PLG	CLCNKB
	PFKFB2	INPP5E
	HGF	NRAS
	PRMT1	ACSL4
	HP	CYP3A4
	HMGB1	CXCL12
	NTRK1	SERPINA12
	HLA-DRB1	PPARD
	SERPINB2	IGF2-AS
	PCSK1	PTEN
	PDGFA	ADAMTS13
	HHEX	MIR216A
	GPX4	EDNRA
	GPX1	SAA1
	PPARD	BBS2
	PRSS2	ELN
	PSMD9	FBN1
	PTBP1	PRPF8
	PTEN	APOL1
	PTGDS	AGXT
	GHR	PLA2G7
	PTGS1	AR
	PTHLH	IL17A
	PTPN1	HPSE
	PRSS1	INF2
	PROC	PROM1
	UTS2R	PARP1
	PPP1R8	ANGPTL4
	PRH2	SLC17A5
	PRKCA	CYBA
	PRKCSH	PLA2R1
	MAPK1	CAVIN1
	GIPR	MT-TS2
	MAPK8	C4A
	MAP2K2	ABCA1
	PTPN6	MT-TQ
	HES1	CDH4
	ITGB3	MT-TW
	LMNA	MIR15A
	LPA	FAS
	CXCL8	ACE2
	LRP5	CCK
	LTA	CYP21A2
	LTBP1	PAX2
	LYZ	ESR1
	IL6R	LIG4
	SMAD5	NRL
	IL15	SNHG6
	LIMK2	TSC1
	JUN	KNG1
	ITGA1	EP300
	INPPL1	ADA
	CXCL10	BAIAP2L1
	KRT16	IL6R
	LAMB2	HIF1A
	IL17A	ITGB3
	LEP	MT-TS1
	LGALS3	MT-TH
	IL1A	MT-TF
	MCAM	TRPV1
	MEP1B	PLG
	COX1	HMGA2
	HSPA5	BAZ1B
	MUC1	HAMP
	HSPA4	PRKAB1
	NCK1	HSPA5
	HSPA1B	SNHG18
	HSPA1A	MIR155
	NOS1	JAK2
	NOS2	MEFV
	HTR2A	SREBF1
	MMP12	UBA5
	MGP	UFM1
	CXCL9	CDK5RAP3
	KMT2A	DDRGK1
	IDUA	UFL1
	IDE	GSTT1
	MMP7	INPPL1
	MMP8	MIR26B
	IAPP	CCL3
	MMP10	TNFRSF1A
	HSD11B2	CARTPT
	GCK	MIR146A
	SYT1	RECQL4
	DEFA3	IFNA1
	THBD	PTPN11
	DEFA1	H6PD
	TIMP1	SORBS1
	DDOST	KLF4
	CYP27B1	GJA1
	CYP24A1	FRMD3
	TLR2	MIR145
	CYP11B2	FGFR3
	TGFBR1	PON2
	TGFB3	APOC2
	ADAM17	CDKN2B-AS1
	ECE1	APOA4
	HNF1A	PDGFB
	HNF1B	SOX2
	E2F1	TBL2
	TFPI	CDKN1C
	TGFA	KL
	DRD3	MGP
	TGFB2	PIK3CA
	CYP4B1	TRIB3
	CYBB	CD36
	TPD52	CD44
	CREM	PAFAH1B1
	BEST1	CLDN16
	CREB1	TCF4
	WFS1	TGIF1
	WT1	OLR1
	XBP1	MEN1
	ZFP36	TEK
	COX8A	CXCR4
	CXCR4	PPIG
	MAPK14	CXCL10
	VCAN	TIMP1
	CRISP2	SHOX
	CTSB	MIR126
	TRPC6	NFE2L2
	TXN	RPGRIP1
	UCP1	GSN
	UCP3	GTF2I
	UMOD	ZMPSTE24
	UTRN	BMP2
	CST3	APOH
	NELFE	LIMK1
	SYK	MLXIPL
	GCG	RFC2
	SAA@	GTF2IRD1
	SAA1	CLIP2
	SCD	NAGA
	SCNN1G	SRC
	PTK2B	CD163
	CXCL11	MIR93
	FABP4	CALCA
	SELL	ABCB1
	SELP	SEC61A1
	S100A9	SMAD4
	S100A8	BBS1
	G6PD	CLDN19
	FLT1	IL5
	FOXO1	F7
	FHL2	MIR34A
	BRD2	PDP1
	ROCK1	RAC1
	ROS1	COL7A1
	RPL36A	TUG1
	RPS19	DIANPH
	F5	CFB
	SHBG	CABIN1
	ST3GAL4	F3
	SNRNP70	BTNL2
	ENG	BAMBI
	MARK2	MT-ND2
	SORD	PRSS1
	SOS1	TOMM40
	SPARC	NFKB1
	SPINK1	REG1A
	STAT1	ROBO1
	STAT3	PTGS1
	SNAI1	SLC2A3
	SMN2	FCAR
	EZH2	GLO1
	ETS1	TFR2
	ESR1	MIR32
	ERBB4	CISD1
	EPO	IQCB1
	EPHX2	CASP9
	SLC22A2	CTSB
	SLPI	IL1R1
	SMN1	GREM1
	EDA	TFRC
		FNDC5
		CPT1A
		HLA-DPA1
		MTR
		MAPK10
		JUN
		COL8A2
		CISH
		SYNPO
		TNFSF10
		TNFRSF11A
		MIAT
		MIR19A
		GAS6
		PRCD
		TRPC6
		PKLR
		ANXA5
		RPS6KB1
		GDNF
		RECK
		OCRL
		TGFBR2
		CSF2
		SERPINA1
		THBS1
		MAPK3
		FOS
		MT-ATP6
		MMP3
		LYZ
		NOS1
		CYP27B1
		GSTP1
		SCG5
		SELL
		UROD
		ITGA4
		LAGE3
		MASP1
		BTK
		PSMB9
		MIF
		IL2RB
		NGF
		IDH2
		CBS
		USB1
		SOD3
		FGFR1
		AFP
		F5
		SI
		IDH1
		MIR106B
		CFP
		CHIT1
		PIK3C2A
		NOTCH2
		MKKS
		WT1-AS
		ALPK3
		CLCN5
		MICA
		TFAM
		GPX1
		ITGA2
		DRD5
		MERTK
		TSC22D1
		MIR125A
		EGFR
		KCNJ1
		KCNN4
		DMD
		LGALS3
		MLN
		TAB2
		SMURF1
		GAST
		NSA2
		EFEMP1
		THSD7A
		CUBN
		SLC26A4
		TP53RK
		TPRKB
		WDR73
		RHO
		SLC34A1
		G6PD
		GAPDH
		SCT
		SAA4
		POLD1
		TGFBR1
		TIMP3
		IL12B
		AKR1B10
		RNLS
		RYR1
		TNFRSF25
		CX3CL1
		LAP3
		SLC9B1
		PRKCA
		CELA3B
		RHOA
		BCAR1
		MYC
		PRSS2
		PSMD9
		NEAT1
		LOC109623489
		TNXB
		ATXN10
		RELA
		PF4
		SLC9A3
		ITGAM
		TAP2
		CHGA
		S100A8
		IKBKG
		NQO1
		C1GALT1
		PTX3
		PTHLH
		CD55
		PMM2
		GFND1
		HLA-DMA
		SQSTM1
		IL15
		HSPB1
		KLRK1
		BAX
		ICOSLG
		HES1
		CTSK
		AIF1
		PRRC2A
		TIMP2
		NOX4
		RAD52
		CYP2C9
		GC
		NLRP2
		RECQL5
		BBS4
		PDGFD
		TAP1
		POU5F1
		CLCNKA
		PRTN3
		SCARB1
		MIP
		IGFBP4
		CARS
		NUP107
		ENG
		MIR223
		NEU1
		BCL2
		TNNI3
		LRPAP1
		NR5A1
		CXCR3
		BDKRB2
		CDH1
		MMP8
		CREB1
		CLU
		CYP4A11
		TTC8
		S100B
		MMP7
		COL1A1
		PLA2G1B
		AXL
		ATP6AP2
		NOTCH1
		SRD5A2
		SRY
		PTER
		ACVRL1
		TKT
		LBR
		SPG7
		HLA-DMB
		NEK8
		NOX1
		ALDH2
		POSTN
		FTH1
		CXCL9
		IL13
		CYP2C19
		BBS7
		BSND
		HSPA4
		SLC22A2
		CMA1
		AQP1
		TNFRSF10A
		CCR6
		GRB2
		HNRNPUL2-BSCL2
		MET
		PRKACA
		CD4
		BBS10
		SLC9A1
		ANGPT1
		ALOX12
		L1CAM
		HLA-C
		APOC1
		TLR9
		DDOST
		ERBB4
		GHSR
		TLR3
		ALPP
		CHI3L1
		TNFSF13B
		DBH
		KANTR
		NEDD4L
		SMAD1
		OGA
		JAK1
		ADRB1
		CCR2
		BCL2L1
		DCN
		PNLIP
		GIPR
		MIR27A
		ATF4
		HELLS
		BMP4
		EPHX2
		PROC
		DRD2
		GZMB
		TRPV4
		CSF3
		F8
		CD19
		MIRLET7B
		ITGB1
		IGFBP7
		MVK
		IL12A
		GPC3
		TXN
		FGB
		EDNRB
		PRKAG2
		PLAU
		UBASH3A
		KIT
		MIR141
		CELA1
		SPARC
		ATRIP
		GSR
		SDHB
		PDGFRB
		PCNA
		FABP3
		COL4A6
		SAMHD1
		ZFYVE26
		SMAD7
		BMPR2
		HSP90AA1
		CDC42
		MIR23B
		SHC1
		MCU
		HOTAIR
		MIR200A
		SLC22A12
		S100A9
		GDF15
		PDCD1
		PSAP
		TAC1
		CASP1
		CYBB
		CCKAR
		SLC22A5
		FGF1
		ACTL7B
		HLA-DRB4
		CSF1
		MIR122
		RECQL
		HSPA1A
		PDE5A
		CMIP
		ESR2
		CNDP2
		ADAM10
		GPX3
		CCR1
		AQP3
		CD59
		CA4
		CRB2
		COMT
		UCA1
		STAT5B
		CCL4
		GP1BA
		THG1L
		PKD2L1
		TAS2R43
		KCNK5
		DDAH2
		CD86
		C1GALT1C1
		CCAT1
		SLPI
		ADD1
		HTR2A
		AHR
		SLC4A4
		NEK1
		DNAJC13
		TGFBI
		ACHE
		CD40
		SP1
		SHPK
		CXCL1
		CD80
		MGAM
		SHISA5
		ATRIP-TREX1
		GANAB
		MMP14
		CCR3
		ITGB2
		AGRN
		CDKN1A
		MYOM2
		CHKB
		ELANE
		NTS
		CD14
		SCNN1A
		ABCG1
		TRPC1
		SLC19A3
		CYP2D6
		ITGA2B
		BCHE
		CPB2
		APOM
		MAF
		DNAJB11
		DNMT1
		NOTCH3
		RAF1
		PKD1L3
		CALD1
		KLK3
		PRKCZ
		MST1
		NID1
		MMP12
		P2RX7
		NES
		HSPA1B
		NFAT5
		IRAK4
		USF1
		COX5A
		XYLT1
		ICOS
		CX3CR1
		HLA-DRB3
		NPY1R
		IL4R
		BBS12
		CA2
		MIR23A
		BBS9
		NAT2
		VIM
		NTN1
		CD226
		HSPG2
		XYLT2
		PLAUR
		TAX1BP3
		NTRK1
		TBXAS1
		PROX1
		ZNF236
		ADH1B
		SMARCA4
		TGM2
		PRDX1
		ENSA
		LOC111365141
		UPK1A
		TJP1
		HBEGF
		KCNJ16
		PKD1L2
		SCNN1B
		PSMB8
		NOD1
		AKT3
		HLA-G
		COL8A1
		PTPRC
		MIR181A1
		IL1RAPL2
		ROCK1
		CDH13
		NR1H3
		ZNF423
		SLC22A3
		MIOX
		SYK
		PODXL
		FOXO3
		BDKRB1
		CDKN1B
		MCKD2
		IL23R
		FLNA
		ERBB2
		SLC26A3
		JAG1
		MB
		MCAM
		CHN2
		UPK3A
		CYP2R1
		ANG
		LAMP2
		VPS39
		CXCL5
		IL21
		SDC4
		PRKN
		SASH1
		FABP5
		DVL1
		NEK9
		ANKS6
		PKD1L1
		IFT43
		DZIP1L
		PKD2L2
		PKDREJ
		PKD1P1
		AQP5
		VEGFC
		P2RX4
		UNC13B
		C16orf58
		PCAT1
		EDN3
		SFTPD
		MIR199B
		CHAT
		CEBPA
		PPIA
		DLC1
		DEFA3
		TNFSF12
		HDAC9
		CPVL
		LTF
		CXCL16
		ALOX5AP
		SLC22A1
		KLKB1
		ENO2
		ALG12
		PBX1
		LRP1
		NCAM1
		RP1
		MIR26A1
		DDC
		MAP2K1
		SDC2
		AFF3
		ASS1
		MBP
		IGFBP5
		MYD88
		CTTN
		ARSA
		FUCA1
		IFNGR1
		UTS2R
		RAB7A
		TOP1
		F10
		PGM3
		SPHK1
		ITGAL
		DDIT3
		ADAMTSL1
		SNAI1
		MSRB3
		SLC11A2
		LTBP1
		BBS5
		LIMK2
		AUH
		RPS12
		RB1
		TMEM147
		SETD2
		CRBN
		CUL3
		MIR342
		PIGR
		ESM1
		KRT19
		RAB27A
		PHEX
		DGKE
		IL22
		SCAF4
		VPS33A
		BST2
		RGMA
		S100A4
		ALOX5
		APP
		DEFA1
		VEGFB
		MED13L
		DRD3
		CRYZ
		F2RL1
		LEF1
		NBEAL2
		P2RX5
		TGFBRAP1
		VPS16
		SLC66A1
		TP73-AS1
		MIRLET7E
		PDIA3P1
		HDAC6
		WDR4
		DYNC2LI1
		TNNT2
		IRF7
		DUOX2
		CYCS
		TNFRSF6B
		STAT4
		SERPINB2
		ALG1
		SEMA3A
		GALNT2
		ATL1
		CD34
		ANPEP
		RPS27A
		NR1I2
		C5
		GCH1
		ARG1
		CDK2
		SKIL
		GP6
		IL33
		HAVCR2
		PGM1
		TYMP
		MTHFD1L
		GJA4
		HSPA1L
		MIR30A
		ATP1A2
		FAM20A
		IL7
		ANXA2
		FN3K
		IL18BP
		HAS2
		ARG2
		OAT
		SOX17
		OSM
		SERPINF2
		MTRR
		IL19
		IL3
		ITIH4
		PTPRO
		NSD2
		CYP2J2
		RGS1
		CAMP
		STAT5A
		BSG
		HPX
		LOC110283621
		EIF2S1
		FAM135A
		MAP3K5
		SIRT3
		SIRT6
		KLK1
		HIST2H2AA3
		CDH5
		ELMO2
		JAK3
		ZMIZ1
		MOK
		NRP1
		MIR133B
		TGFB3
		HAS3
		IFNB1
		CASP12
		EGR1
		ALCAM
		PSMA6
		AHSP
		MMP10
		DCC
		SMAD5
		TLR1
		IGHE
		KCNMA1
		CCL20
		ZEB2
		AMH
		FABP12
		TNFRSF13B
		MCL1
		CFHR1
		COL3A1
		EZR
		MIR26A2
		GRN
		TNC
		CTSG
		UPK2
		HSPA8
		TRAF6
		SOX2-OT
		TNFSF13
		EYA1
		A4GALT
		ADA2
		DRD4
		ITGB6
		PRKCSH
		SAA2
		C4B
		PSRC1
		VDAC1
		RNF10
		OGG1
		RET
		ACTL7A
		MIR497
		KITLG
		NPPC
		ENTPD1
		IRF5
		ANGPTL2
		BLNK
		DPAGT1
		SLC34A3
		SLC35A2
		PLEKHF1
		ERRFI1
		PHLPP1
		CCNB1
		CNKSR3
		SSTR2
		LGALS1
		ITGA1
		CD209
		NPNT
		MIR9-2
		IFNL3
		GFPT2
		DES
		PREP
		COQ5
		PKM
		SCD5
		ADAM17
		APEX1
		RASGRP1
		NSD1
		ZFP36
		MT-RNR1
		RENBP
		PLA2G2A
		COL1A2
		KCNJ10
		PTH1R
		ADD2
		SLC2A9
		ADCYAP1
		IL9
		SCNN1G
		TNFRSF10D
		PPOX
		TKTL1
		MIR130B
		TAT
		ADCY10
		MCTP2
		ABCG2
		MCF2L2
		LOC110673971
		IL5RA
		PLCE1
		KLF6
		PLCG1
		MIR196A2
		IRF3
		ITGA3
		MIRLET7A3
		SYVN1
		MIR200C
		RARA
		ENHO
		SCAF8
		AGMO
		GALNT3
		LAMA5
		ETS1
		GSK3A
		MMUT
		MIRLET7A2
		YWHAE
		CYP3A5
		RBMS1
		MSR1
		MIR199A1
		MIR646HG
		STAB1
		MECP2
		MT2A
		TYMS
		PTPN13
		ALAD
		NOTCH4
		STX8
		E2F1
		ST6GALNAC2
		MIR215
		STIM1
		PTGIR
		ZFYVE9
		SEZ6L
		EFNB2
		NDST1
		ITPR1
		PROS1
		VCL
		COQ2
		F12
		LAMB1
		SLC2A10
		KMT2C
		LIF
		PROCR
		ABCG8
		BLZF1
		TSC2
		HPSE2
		BID
		FMN2
		ACTA1
		RHOD
		LECT2
		HDAC4
		DDAH1
		TET2
		SMPD1
		CTBP1
		FOSL1
		SLC2A12
		ACP5
		ANGPTL3
		SOAT1
		PRODH
		CEP120
		S100A1
		C1QTNF3
		ST6GAL1
		CASP7
		CNSN
		LRRC7
		MASP2
		CD63
		DNM1L
		MAT1A
		RARB
		FCGR2A
		KLF15
		DNASE1
		FCGR3A
		FOXP2
		OGN
		SDK1
		TSBP1
		TCF19
		SUV39H1
		LOX
		LAMC1
		LAMA1
		DUSP2
		FCN3
		APAF1
		APLNR
		KHK
		SETD7
		VNN1
		CD38
		GSTA1
		CASQ1
		COL5A1
		LCN1
		ABCC2
		CR1
		CNTNAP2
		MIR100
		PAK1
		TIMM44
		ANKS1B
		VASH1
		LY75
		ACTB
		XIAP
		CCL26
		FMOD
		NCALD
		RAP1B
		PTK2B
		AASS
		A2M
		PLEKHH2
		SERPINB13
		ATP6V1B1
		EHMT2
		AGTRAP
		MIR194-1
		ZNF407
		CADM1
		SDC3
		MIR1207
		MIR210
		RGN
		GCLM
		ASIC5
		AZGP1
		TBX18
		ITGAV
		TLR10
		EEF1A1
		CDK5
		ORAI1
		ITGA6
		UCHL1
		CXCR6
		TNFRSF8
		PTAFR
		MEP1B
		IL1RL1
		HSD3B2
		CPOX
		CCNL1
		TXNRD1
		SLC15A1
		SLC2A5
		CLDN1
		ADORA1
		LYVE1
		MIR9-1
		MIR9-3
		DRD1
		RLN2
		FCGR3B
		MIA3
		PTPN6
		TRB
		NRG3
		CD68
		SNORA33
		CXCR1
		KIRREL1
		F2RL3
		SLC6A2
		FBLN1
		MYL2
		MDK
		AGPAT1
		SKP2
		SRGAP2
		ACTR3
		DEFB1
		CRY2
		ACKR1
		LRG1
		GSTK1
		SLC15A2
		CD69
		PLA2G4A
		IL11
		LIPA
		ALPI
		TIA1
		KIAA0753
		H19-ICR
		HYOU1
		PRKD1
		HSP90B1
		MIR135A1
		MIR135A2
		COX4I1
		NDST2
		CLEC4A
		PLVAP
		SUV39H2
		ROCK2
		CSNK2B
		LEKR1
		CCR7
		DKK1
		MKI67
		BMPR1A
		NFATC1
		ICAM3
		PDSS2
		KCNE1
		MAP2K2
		HSPB2
		IRF8
		AOX1
		SLC6A6
		F9
		SP3
		TYRO3
		NT5E
		CD74
		ATP1A1
		SOSTDC1
		INSRR
		IQGAP1
		FLNB
		TRA
		LAMA4
		TNFAIP8
		GCLC
		AREG
		TRAF1
		IGES
		GPHA2
		HNRNPF
		RXRG
		ANXA1
		ACVR1
		PARG
		RTN1
		CYLD
		MX1
		SYN2
		KIRREL2
		ITGB4
		SHANK1
		ALK
		NOX5
		TWIST1
		CCN1
		GPX4
		PARK7
		CYP11A1
		GPR55
		THBS4
		EPAS1
		CTSA
		VPS4B
		MBD2
		PIGN
		ZADH2
		CDH20
		ALPK2
		CCND2
		ZEB1
		TACR1
		SOX9
		SERPINA4
		CCL28
		HMCN1
		RPSAP52
		PRPSAP1
		LINC01191
		TBXT
		UBE2V1
		BAD
		TMPO
		SMAD6
		WDR35
		ZNF274
		STK19
		GPANK1
		IGSF21
		KLHDC7A
		ECE1
		MTHFS
		UHRF1
		ETFB
		ENO1
		GABRR2
		IFI27
		ADNP
		FGFR2
		LCP1
		BCL2L11
		PPP3CA
		NLRC4
		WTAP
		SPON2
		PXN
		MTMR3
		MIR186
		XRCC2
		MAEA
		TNFSF4
		DHFR
		RETNLB
		MAGI2
		VAV3
		CTSC
		FAT1
		ILK
		CAPN6
		SHROOM3
		MGAT5B
		KCNK1
		PDLIM5
		MIR320A
		SUCNR1
		TNFRSF10B
		CD46
		RBFOX1
		RBP1
		KRT18P34
		YAP1
		F2R
		PFKFB2
		PODN
		FDX1
		PDGFC
		SALL1
		RREB1
		SLC12A5
		PLSCR3
		ZFP36L1
		PCSK6
		NAV3
		RAMP3
		CDK7
		LAMB2
		ACAA1
		WNT1
		ERCC6
		LHX3
		PARL
		MAD2L2
		MUC16
		ACSM3
		PICK1
		CYP2B6
		SIRT4
		KLRA1P
		SLIT2
		HRG
		MIR148B
		RAMP2
		DDX58
		DGKQ
		DDR1
		GP2
		SLCO1A2
		UNC13D
		EXOC7
		SRSF2
		SUCLG2
		CYGB
		SORCS3
		LILRB3
		CYP20A1
		SLC26A8
		SPINT2
		FCER2
		CDCA7
		LY86-AS1
		SDC1
		MAPKBP1
		PDPK1
		TRIM68
		MCM10
		ZNF7
		COMMD5
		OR52I1
		VEPH1
		PREX1
		GPR158
		EGFL8
		HAS1
		RNF5
		DXO
		CHRNA1
		SERPINH1
		KCNH7
		CD47
		CRHR1
		ASCL2
		CDK9
		CPT1C
		LTC4S
		ERVFRD-1
		XCL1
		NEFL
		CCL8
		LAMP3
		TXN2
		FOXP4
		ODC1
		INPP5D
		S1PR1
		AK1
		CCL23
		PRCP
		STAT6
		MIR107
		NOX3
		IKZF1
		CXCR2
		NRP2
		CCND3
		HIPK2
		MR1
		CR2
		LRP8
		RAPGEF5
		BTBD11
		STEAP1B
		FCGRT
		SLC22A11
		PSD3
		MT-RNR2
		CALB2
		CALCRL
		TMEM132D
		RAB38
		MIR4490
		CEP164
		MPRIP
		C1QA
		DDN
		TNFSF12-TNFSF13
		TENM2
		CLEC12A
		TBC1D5
		RPL26P31
		TRAF3
		GRIA1
		TSPYL2
		TNR
		CALCR
		TBK1
		FCGR1A
		TRPA1
		COL4A3BP
		ATP5F1B
		ARRB2
		EXT1
		MYT1L
		BCS1L
		DACH1
		BTD
		SEMA3G
		GCA
		MIR214
		PLD1
		XIST
		CAP1
		ACTR2
		CFHR3
		DUP2Q31.1
		SCN7A
		TRAF4
		DCDC2
		MT-TR
		UBC
		CDH22
		SMN1
		NPR1
		GAL3ST1
		DUSP1
		GTPBP4
		KIF6
		ANXA7
		VSTM2B
		KCNJ9
		VTCN1
		HNRNPC
		STMN1
		DNMT3A
		CREB5
		MRPS15
		CCDC68
		OSCP1
		MAP3K21
		GRAMD2B
		LINC00917
		LINC02774
		LOC100506023
		LOC729200
		LOC101928236
		LOC100131080
		SLC9C1
		MIR335
		MAP3K14
		PGA3
		PGA5
		PGA4
		RARS
		MED25
		AQP11
		LALBA
		GABRR1
		RBL1
		DIAPH3
		BCAS1
		RAD51B
		KRT23
		KRT31
		SPPL3
		SFI1
		DCAF5
		ANKRD10
		KRTAP3-3
		KRTAP3-2
		SUSD6
		TMEM99
		RNU6ATAC2P
		GSTM5P1
		HMGN1P17
		INSYN1-AS1
		RN7SL865P
		RNU6-921P
		RNU7-88P
		TOMM22P3
		LINC02511
		ENSG00000260624
		ENSG00000279237
		ENSG00000249697
		ENSG00000227489
		ENSG00000257407
		GC14M068442
		LOC101927712
		GC10M095525
		LOC105378977
		ENSG00000285731
		PIR43800
		GC13M059528
		GC13P059481
		GC17P041006
		GC05P056372
		NPR3
		LRP2BP
		PGC
		IPPK
		H3F3B
		MITF
		NDUFB4
		RPS15
		ARHGAP45
		WNK1
		TFE3
		MMP16
		SLC6A19
		TAGLN
		SLC5A6
		SLC9A3R2
		ACTG2
		CHPT1
		SLC41A1
		WDR62
		GLB1
		DAG1
		RPTOR
		C10orf71
		JCHAIN
		WNK4
		ELAVL1
		CCL21
		FYN
		TCF3
		MMP24
		SORT1
		HORMAD2-AS1
		H2AFX
		PPT2-EGFL8
		SLC4A1
		FBL
		TIMM8A
		LIN28A
		TPSAB1
		COQ8A
		ACTA2
		TNFRSF10C
		UBA52
		PLOD1
		ZNF365
		SLC22A6
		CYP2A6
		NAP1L4
		SCP2
		WEE1
		TEC
		CD79B
		C1QC
		DGUOK
		FGFRL1
		TRPM5
		HNRNPH2
		IGHM
		EIF2A
		MFAP3
		FAH
		CD2
		NUP62
		TRIAP1
		MFAP4
		FIBP
		LPAR1
		ATP6V0A2
		MEOX2
		TNS1
		MAP1LC3A
		STARD5
		LINC01619
		POLI
		COQ9
		ACTC1
		GIPC1
		SMPD2
		RNR1
		ELK1
		TENM4
		SSB
		LTBR
		PNKP
		VRK3
		TNFRSF19
		RPL37A
		ZNF175
		SAP30BP
		TRIM65
		TRIM47
		FBF1
		C19orf81
		ADM5
		TSSC4
		UCN3
		ADK
		LTA4H
		POMGNT2
		MIR455
		C5AR1
		GRAP
		TNFSF14
		PML
		CRLS1
		SLC3A1
		DNM3
		ANXA11
		WWC1
		RYR3
		REV1
		KERA
		FUT9
		SETMAR
		SOX11
		CDK3
		MORC2
		REPS1
		KDM4D
		LSAMP
		EPYC
		SYT3
		CGNL1
		CABYR
		PTOV1
		PIK3IP1
		RNF185
		CCDC80
		CRCP
		TAPT1
		GUCY1A1
		METTL23
		GATC
		ZNF473
		UNK
		TSGA10
		MFSD11
		EXD2
		CTU1
		POP5
		SEPTIN9
		SLC35A5
		SPINK4
		RAVER2
		ANKRD29
		TSKS
		ABRACL
		C19orf48
		TTC39C
		IGSF22
		LYG1
		CFAP44
[truncated: 392 more rows]
